# Supplementary material for: PD-1 Blockade and TLR7 Activation Lack Therapeutic Benefit in Chronic Simian Immunodeficiency Virus-Infected Macaques on Antiretroviral Therapy
Source: PubMed Central journal article supplement (PMC6811450; doi:10.1128/aac.01163-19), 2019-10-22
Supplement: AAC.01163-19-s0001.pdf [file AAC.01163-19-s0001.pdf]

## Supplemental Figures

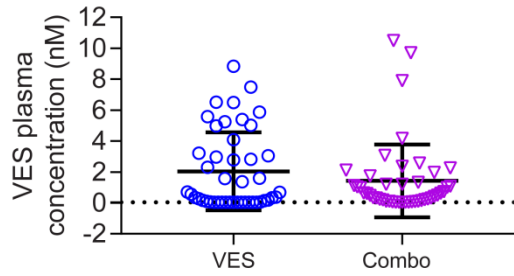

**Supplemental Figure 1. VES plasma exposure.** Concentration of VES in the plasma 30 min post dose assayed by LC-MS/MS. Each symbol represents one animal at one time point, with all ten time points grouped into a single column. Group mean and standard deviation are marked in black. Lower limit of quantitation (0.05 ng/ml) is marked with a dotted line.

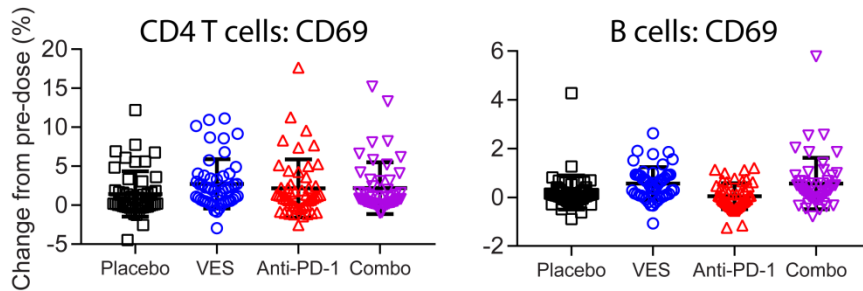

**Supplemental Figure 2. CD4 T and B cell activation in response to oral dosing of VES.** Percentage of CD69+ cells among peripheral CD4+ T cells (left) and B cells (right) assayed by flow cytometry and expressed as change from pre-dose to 24 hours post-dose. Each symbol represents one animal at one time point, with all the time points grouped into a single column. Group mean and standard deviation are marked in black.

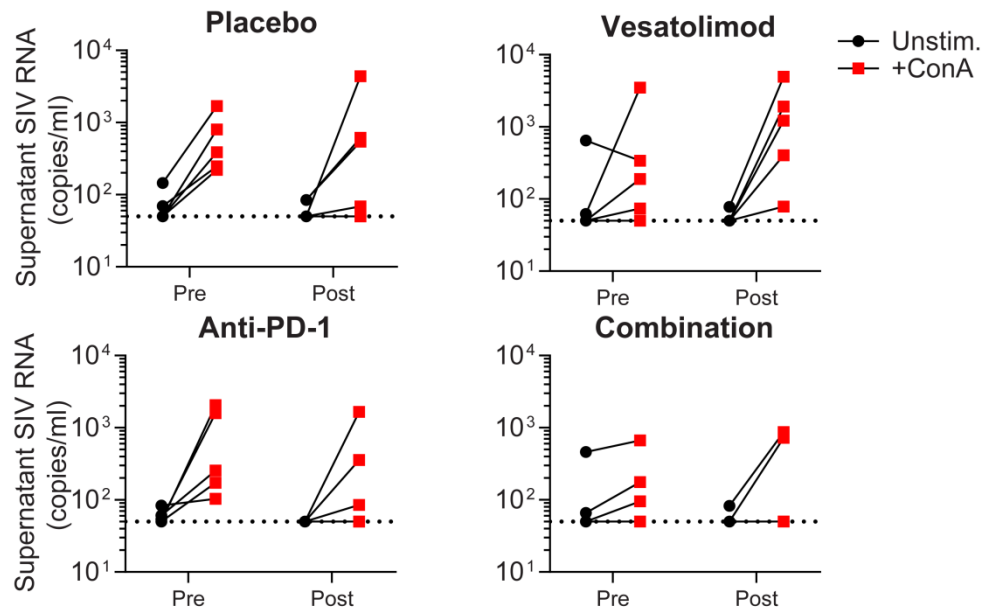

**Supplemental Figure 3. Ex vivo activation of the SIV reservoir from PBMCs.** SIV RNA quantified by qRT-PCR from the supernatants of PBMCs collected pre-therapy (week -2 relative to dose 1) and post-therapy (2 weeks post last dose) and unstimulated or stimulated with ConA for 6 days in culture.
